# Supplementary material
Source: PubMed Central journal article supplement (PMC3697718)
Supplement: JCM.00492-13_zjm999092623so1.pdf [file JCM.00492-13_zjm999092623so1.pdf]

3 Details referring to the Results section:

4 Table S1. Distribution and identification of the 76 bacterial species identified using only conventional  
5 phenotypic identification; 15 of the species were absent from our MALDI-TOF database.

6 Table S2. Distribution and identification of the 124 bacterial species identified using only MALDI-TOF; 103 of  
7 the species were absent from Vitek 2 database and only 21 were present.

8 Table S3. List of 21 species of 670 isolates that were confirmed by a second phenotypic identification; 3 of these  
9 species were absent from our MALDI-TOF database and 18 were present.

10 Table S4. List of 339 species of 1,273 isolates that were confirmed using molecular identification; 24 of these  
11 species were absent from our MALDI-TOF database and 63 from the Brüker database.

12 Table S5. Distribution of the sources of clinical samples for the 48 rare bacterial species identified by phenotypic  
13 identification.

14 **Table S1. Distribution and identification of the 76 bacterial species identified using only conventional phenotypic**  
 15 **identification; 15 of the species were absent from our MALDI-TOF database.**

| Phylum                        | Genus                          | Bacterial species identified using only CPI* | N° of isolates               | Our MALDI-TOF database |         |
|-------------------------------|--------------------------------|----------------------------------------------|------------------------------|------------------------|---------|
| <i>Actinobacteria</i>         | <i>Actinomadura</i>            | <i>Actinomadura cremea</i>                   | 1                            | absent                 |         |
|                               | <i>Actinomyces</i>             | <i>Actinomyces viscosus</i>                  | 5                            | present                |         |
|                               | <i>Brevibacterium</i>          | <i>Brevibacterium luteolum</i>               | 1                            | present                |         |
|                               | <i>Cellulosimicrobium</i>      | <i>Cellulosimicrobium cellulans</i>          | 1                            | present                |         |
|                               | <i>Corynebacterium</i>         | <i>Corynebacterium auriscanis</i>            |                              | 3                      | present |
|                               |                                | <i>Corynebacterium bovis</i>                 |                              | 2                      | present |
|                               |                                | <i>Corynebacterium macginleyi</i>            |                              | 17                     | present |
|                               |                                | <i>Corynebacterium ulcerans</i>              |                              | 4                      | present |
|                               | <i>Gordonia</i>                | <i>Gordonia sputi</i>                        | 1                            | present                |         |
|                               | <i>Leifsonia</i>               | <i>Leifsonia aquatica</i>                    | 3                            | present                |         |
|                               | <i>Microbacterium</i>          | <i>Microbacterium flavescens</i>             | 1                            | present                |         |
|                               | <i>Nocardia</i>                | <i>Nocardia abscessus</i>                    |                              | 1                      | present |
|                               |                                | <i>Nocardia asteroides</i>                   |                              | 1                      | absent  |
|                               |                                | <i>Nocardia otitidiscaviarum</i>             |                              | 1                      | present |
|                               |                                | <i>Pseudoclavibacter</i>                     | <i>Zimmermannella bifida</i> | 1                      | absent  |
|                               | <i>Varibaculum</i>             | <i>Varibaculum cambriense</i>                | 2                            | present                |         |
|                               | <i>Bacteroidetes</i>           | <i>Bacteroides</i>                           | <i>Bacteroides eggerthii</i> | 2                      | present |
|                               |                                |                                              | <i>Bacteroides stercoris</i> | 29                     | present |
|                               |                                | <i>Myroides</i>                              | <i>Myroides odoratimimus</i> | 1                      | present |
| <i>Prevotella</i>             |                                | <i>Prevotella loescheii</i>                  | 1                            | absent                 |         |
|                               | <i>Prevotella massiliensis</i> | 1                                            | present                      |                        |         |
| <i>Firmicutes</i>             | <i>Bacillus</i>                | <i>Bacillus coagulans</i>                    | 1                            | present                |         |
|                               | <i>Clostridium</i>             | <i>Clostridium baratii</i>                   | 1                            | present                |         |
|                               |                                | <i>Clostridium bif fermentans</i>            | 5                            | present                |         |
|                               |                                | <i>Clostridium histolyticum</i>              | 1                            | present                |         |
|                               | <i>Dialister</i>               | <i>Dialister pneumosintes</i>                | 3                            | absent                 |         |
|                               | <i>Facklamia</i>               | <i>Facklamia languida</i>                    | 1                            | present                |         |
|                               | <i>Lactobacillus</i>           | <i>Lactobacillus acidophilus</i>             | 2                            | present                |         |
|                               |                                | <i>Lactobacillus vaginalis</i>               | 1                            | present                |         |
|                               |                                | <i>Lactococcus lactis subsp. cremoris</i>    | 3                            | absent                 |         |
|                               | <i>Listeria</i>                | <i>Listeria grayi</i>                        | 1                            | present                |         |
|                               | <i>Peptoniphilus</i>           | <i>Peptoniphilus lacrimalis</i>              | 2                            | present                |         |
|                               | <i>Sporosarcina</i>            | <i>Sporosarcina ginsengisoli</i>             | 1                            | absent                 |         |
|                               | <i>Staphylococcus</i>          | <i>Staphylococcus carnosus</i>               | 2                            | present                |         |
|                               |                                | <i>Staphylococcus chromogenes</i>            | 1                            | present                |         |
|                               |                                | <i>Staphylococcus hyicus</i>                 | 1                            | present                |         |
| <i>Staphylococcus kloosii</i> |                                | 3                                            | present                      |                        |         |
| <i>Staphylococcus lentus</i>  |                                | 8                                            | present                      |                        |         |
| <i>Streptococcus</i>          |                                | <i>Streptococcus sobrinus</i>                | 1                            | present                |         |
|                               | <i>Streptococcus uberis</i>    | 1                                            | present                      |                        |         |
| <i>Fusobacteria</i>           | <i>Fusobacterium</i>           | <i>Fusobacterium varium</i>                  | 4                            | present                |         |

| Phylum                                                         | Genus                      | Bacterial species identified using only CPI*                   | N° of isolates | Our MALDI-TOF database |
|----------------------------------------------------------------|----------------------------|----------------------------------------------------------------|----------------|------------------------|
| Proteobacteria                                                 | <i>Leptotrichia</i>        | <i>Leptotrichia goodfellowii</i>                               | 1              | absent                 |
|                                                                |                            | <i>Leptotrichia trevisanii</i>                                 | 1              | present                |
|                                                                | <i>Aeromonas</i>           | <i>Aeromonas sobria</i>                                        | 8              | present                |
|                                                                | <i>Agrobacterium</i>       | <i>Agrobacterium radiobacter</i>                               | 1              | absent                 |
|                                                                | <i>Anaerobiospirillum</i>  | <i>Anaerobiospirillum succiniciproducens</i>                   | 1              | absent                 |
|                                                                | <i>Bordetella</i>          | <i>Bordetella pertussis</i>                                    | 16             | present                |
|                                                                | <i>Campylobacter</i>       | <i>Campylobacter upsaliensis</i>                               | 1              | present                |
|                                                                | <i>Cardiobacterium</i>     | <i>Cardiobacterium hominis</i>                                 | 1              | present                |
|                                                                | <i>Chromobacterium</i>     | <i>Chromobacterium violaceum</i>                               | 1              | present                |
|                                                                | <i>Citrobacter</i>         | <i>Citrobacter sedlakii</i>                                    | 2              | present                |
|                                                                | <i>Cronobacter</i>         | <i>Cronobacter sakazakii</i>                                   | 11             | present                |
|                                                                | <i>Escherichia</i>         | <i>Escherichia fergusonii</i>                                  | 1              | present                |
|                                                                |                            | <i>Escherichia hermannii</i>                                   | 9              | present                |
|                                                                | <i>Helicobacter</i>        | <i>Helicobacter pylori</i>                                     | 1              | present                |
|                                                                | <i>Ignatzschineria</i>     | <i>Ignatzschineria larvae</i>                                  | 1              | absent                 |
|                                                                | <i>Kluyvera</i>            | <i>Kluyvera intermedia</i>                                     | 1              | present                |
|                                                                | <i>Mannheimia</i>          | <i>Mannheimia haemolytica</i>                                  | 1              | present                |
|                                                                | <i>Neisseria</i>           | <i>Neisseria cinerea</i>                                       | 6              | present                |
|                                                                |                            | <i>Neisseria polysaccharea</i>                                 | 1              | present                |
|                                                                | <i>Pasteurella</i>         | <i>Pasteurella dagmatis</i>                                    | 1              | present                |
|                                                                |                            | <i>Pasteurella pneumotropica</i>                               | 3              | present                |
|                                                                | <i>Pseudomonas</i>         | <i>Pseudomonas chlororaphis subsp. aureofaciens</i>            | 1              | present                |
|                                                                |                            | <i>Pseudomonas luteola</i>                                     | 4              | present                |
|                                                                |                            | <i>Pseudomonas oleovorans</i>                                  | 1              | present                |
|                                                                |                            | <i>Pseudomonas syringae</i>                                    | 1              | present                |
|                                                                | <i>Psychrobacter</i>       | <i>Psychrobacter phenylpyruvicus</i>                           | 1              | absent                 |
|                                                                | <i>Roseomonas</i>          | <i>Roseomonas ludipueritiae</i>                                | 1              | absent                 |
|                                                                | <i>Salmonella</i>          | <i>Salmonella enterica</i>                                     | 8              | present                |
|                                                                |                            | <i>Salmonella enterica subsp. arizonae</i>                     | 1              | present                |
|                                                                |                            | <i>Salmonella enterica subsp. enterica serovar Enteritidis</i> | 5              | present                |
| <i>Salmonella enterica subsp. enterica serovar Paratyphi A</i> |                            | 3                                                              | present        |                        |
| <i>Salmonella enterica subsp. enterica serovar Typhimurium</i> |                            | 3                                                              | present        |                        |
| <i>Serratia</i>                                                | <i>Serratia plymuthica</i> | 7                                                              | present        |                        |
| <i>Shigella</i>                                                | <i>Shigella flexneri</i>   | 12                                                             | absent         |                        |
|                                                                | <i>Shigella sonnei</i>     | 26                                                             | absent         |                        |

16 CPI\*: conventional phenotypic identification (Gram staining, API, Vitek 2 system identification).

17 **Table S2. Distribution and identification of the 124 bacterial species identified using only MALDI-TOF; 103 of the**  
 18 **species were absent from Vitek 2 database and only 21 were present.**

| Phylum                | Genus                   | Bacterial species identified using only MALDI-TOF | N° of isolates                    | Vitek 2 database |        |
|-----------------------|-------------------------|---------------------------------------------------|-----------------------------------|------------------|--------|
| <b>Actinobacteria</b> | <i>Actinobaculum</i>    | <i>Actinobaculum massiliense</i>                  | 1                                 | absent           |        |
|                       | <i>Actinomyces</i>      | <i>Actinomyces radidentis</i>                     | 2                                 | absent           |        |
|                       | <i>Arthrobacter</i>     | <i>Arthrobacter polychromogenes</i>               | 1                                 | absent           |        |
|                       | <i>Atopobium</i>        | <i>Atopobium minutum</i>                          | 1                                 | absent           |        |
|                       | <i>Bifidobacterium</i>  | <i>Bifidobacterium breve</i>                      | 7                                 | absent           |        |
|                       |                         | <i>Bifidobacterium dentium</i>                    | 1                                 | absent           |        |
|                       | <i>Brevibacterium</i>   | <i>Brevibacterium massiliense</i>                 | 1                                 | absent           |        |
|                       |                         | <i>Brevibacterium paucivorans</i>                 | 1                                 | absent           |        |
|                       |                         | <i>Brevibacterium ravensturnense</i>              | 1                                 | absent           |        |
|                       | <i>Collinsella</i>      | <i>Collinsella aerofaciens</i>                    | 1                                 | absent           |        |
|                       | <i>Corynebacterium</i>  | <i>Corynebacterium fastidiosum</i>                | 1                                 | absent           |        |
|                       |                         | <i>Corynebacterium freneyi</i>                    | 1                                 | absent           |        |
|                       |                         | <i>Corynebacterium glutamicum</i>                 | 1                                 | absent           |        |
|                       |                         | <i>Corynebacterium imitans</i>                    | 1                                 | absent           |        |
|                       |                         | <i>Corynebacterium mucifaciens</i>                | 3                                 | absent           |        |
|                       |                         | <i>Corynebacterium pseudogenitalium</i>           | 2                                 | absent           |        |
|                       |                         | <i>Corynebacterium pseudotuberculosis</i>         | 1                                 | absent           |        |
|                       |                         | <i>Microbacterium</i>                             | <i>Microbacterium paraoxydans</i> | 1                | absent |
|                       |                         |                                                   | <i>Microbacterium schleiferi</i>  | 1                | absent |
|                       |                         | <i>Nocardia</i>                                   | <i>Nocardia cyriacigeorgica</i>   | 1                | absent |
|                       | <i>Trueperella</i>      | <i>Trueperella pyogenes</i>                       | 1                                 | absent           |        |
| <b>Bacteroidetes</b>  | <i>Bacteroides</i>      | <i>Bacteroides cellulosilyticus</i>               | 3                                 | absent           |        |
|                       | <i>Butyricimonas</i>    | <i>Butyricimonas virosa</i>                       | 1                                 | absent           |        |
|                       | <i>Capnocytophaga</i>   | <i>Capnocytophaga canimorsus</i>                  | 2                                 | absent           |        |
|                       |                         | <i>Capnocytophaga gingivalis</i>                  | 1                                 | absent           |        |
|                       |                         | <i>Capnocytophaga ochracea</i>                    | 1                                 | absent           |        |
|                       | <i>Chryseobacterium</i> | <i>Chryseobacterium gleum</i>                     | 3                                 | present          |        |
|                       | <i>Porphyromonas</i>    | <i>Porphyromonas gingivalis</i>                   | 1                                 | absent           |        |
|                       |                         | <i>Porphyromonas gulae</i>                        | 1                                 | absent           |        |
|                       | <i>Prevotella</i>       | <i>Prevotella pallens</i>                         | 1                                 | absent           |        |
|                       | <i>Weeksella</i>        | <i>Weeksella virosa</i>                           | 2                                 | absent           |        |
| <b>Firmicutes</b>     | <i>Anaerococcus</i>     | <i>Anaerococcus lactolyticus</i>                  | 2                                 | absent           |        |
|                       |                         | <i>Anaerococcus octavius</i>                      | 6                                 | absent           |        |
|                       |                         | <i>Anaerococcus tetradius</i>                     | 3                                 | absent           |        |
|                       | <i>Bacillus</i>         | <i>Bacillus amyloliquefaciens</i>                 | 1                                 | absent           |        |
|                       |                         | <i>Bacillus circulans</i>                         | 3                                 | absent           |        |
|                       |                         | <i>Bacillus megaterium</i>                        | 2                                 | absent           |        |
|                       |                         | <i>Bacillus mycoides</i>                          | 1                                 | absent           |        |
|                       |                         | <i>Bacillus subtilis</i>                          | 2                                 | absent           |        |
|                       |                         | <i>Bacillus thuringiensis</i>                     | 3                                 | absent           |        |

| Phylum | Genus                 | Bacterial species identified using only MALDI-TOF | N° of isolates | Vitek 2 database |
|--------|-----------------------|---------------------------------------------------|----------------|------------------|
|        | <i>Brevibacillus</i>  | <i>Brevibacillus agri</i>                         | 1              | absent           |
|        |                       | <i>Brevibacillus brevis</i>                       | 1              | absent           |
|        | <i>Clostridium</i>    | <i>Clostridium cadaveris</i>                      | 1              | absent           |
|        |                       | <i>Clostridium celerecrescens</i>                 | 3              | absent           |
|        |                       | <i>Clostridium chauvoei</i>                       | 1              | absent           |
|        |                       | <i>Clostridium sphenoides</i>                     | 1              | absent           |
|        |                       | <i>Clostridium subterminale</i>                   | 1              | absent           |
|        |                       | <i>Clostridium tetani</i>                         | 2              | absent           |
|        | <i>Enterococcus</i>   | <i>Enterococcus cecorum</i>                       | 1              | present          |
|        |                       | <i>Enterococcus hirae</i>                         | 12             | present          |
|        |                       | <i>Enterococcus raffinosus</i>                    | 3              | present          |
|        | <i>Eubacterium</i>    | <i>Eubacterium tenue</i>                          | 2              | absent           |
|        |                       | <i>Eubacterium yurii</i>                          | 1              | absent           |
|        | <i>Gemella</i>        | <i>Gemella sanguinis</i>                          | 1              | present          |
|        | <i>Lactobacillus</i>  | <i>Lactobacillus delbrueckii</i>                  | 8              | absent           |
|        |                       | <i>Lactobacillus iners</i>                        | 3              | absent           |
|        |                       | <i>Lactobacillus johnsonii</i>                    | 1              | absent           |
|        |                       | <i>Lactobacillus mucosae</i>                      | 1              | absent           |
|        |                       | <i>Lactobacillus murinus</i>                      | 3              | absent           |
|        |                       | <i>Lactobacillus salivarius</i>                   | 2              | absent           |
|        | <i>Lactococcus</i>    | <i>Lactococcus garvieae</i>                       | 2              | present          |
|        | <i>Leuconostoc</i>    | <i>Leuconostoc mesenteroides</i>                  | 1              | absent           |
|        | <i>Mogibacterium</i>  | <i>Mogibacterium timidum</i>                      | 1              | absent           |
|        | <i>Paenibacillus</i>  | <i>Paenibacillus amylolyticus</i>                 | 2              | absent           |
|        |                       | <i>Paenibacillus barcinonensis</i>                | 1              | absent           |
|        | <i>Pediococcus</i>    | <i>Pediococcus acidilactici</i>                   | 5              | present          |
|        |                       | <i>Pediococcus pentosaceus</i>                    | 3              | present          |
|        |                       | <i>Peptococcus niger</i>                          | 1              | absent           |
|        | <i>Robinsoniella</i>  | <i>Robinsoniella peoriensis</i>                   | 3              | absent           |
|        | <i>Ruminococcus</i>   | <i>Ruminococcus gnavus</i>                        | 1              | absent           |
|        | <i>Staphylococcus</i> | <i>Staphylococcus arlettae</i>                    | 1              | present          |
|        |                       | <i>Staphylococcus condimenti</i>                  | 2              | absent           |
|        |                       | <i>Staphylococcus pasteurii</i>                   | 61             | absent           |
|        |                       | <i>Staphylococcus pettenkoferi</i>                | 29             | absent           |
|        |                       | <i>Staphylococcus pseudintermedius</i>            | 17             | absent           |
|        |                       | <i>Staphylococcus vitulinus</i>                   | 1              | present          |
|        | <i>Streptococcus</i>  | <i>Streptococcus canis</i>                        | 1              | present          |
|        |                       | <i>Streptococcus cristatus</i>                    | 6              | present          |
|        |                       | <i>Streptococcus equi</i>                         | 3              | absent           |
|        |                       | <i>Streptococcus massiliensis</i>                 | 3              | absent           |
|        |                       | <i>Streptococcus parasanguinis</i>                | 37             | absent           |
|        |                       | <i>Streptococcus pyogenes</i>                     | 75             | present          |

| Phylum                | Genus                  | Bacterial species identified using only MALDI-TOF | N° of isolates | Vitek 2 database |
|-----------------------|------------------------|---------------------------------------------------|----------------|------------------|
|                       |                        | <i>Streptococcus vestibularis</i>                 | 9              | present          |
|                       | <i>Veillonella</i>     | <i>Veillonella dispar</i>                         | 4              | absent           |
|                       |                        | <i>Veillonella montpellierensis</i>               | 1              | absent           |
| <b>Fusobacteria</b>   | <i>Fusobacterium</i>   | <i>Fusobacterium periodonticum</i>                | 1              | absent           |
| <b>Proteobacteria</b> | <i>Acinetobacter</i>   | <i>Acinetobacter bereziniae</i>                   | 34             | absent           |
|                       |                        | <i>Acinetobacter calcoaceticus</i>                | 4              | absent           |
|                       |                        | <i>Acinetobacter parvus</i>                       | 2              | absent           |
|                       |                        | <i>Acinetobacter pittii</i>                       | 84             | absent           |
|                       |                        | <i>Acinetobacter radioresistens</i>               | 3              | absent           |
|                       |                        | <i>Acinetobacter schindleri</i>                   | 1              | absent           |
|                       | <i>Aggregatibacter</i> | <i>Aggregatibacter segnis</i>                     | 1              | absent           |
|                       | <i>Agrobacterium</i>   | <i>Agrobacterium tumefaciens</i>                  | 2              | absent           |
|                       | <i>Burkholderia</i>    | <i>Burkholderia gladioli</i>                      | 1              | present          |
|                       |                        | <i>Burkholderia multivorans</i>                   | 10             | absent           |
|                       | <i>Campylobacter</i>   | <i>Campylobacter curvus</i>                       | 1              | absent           |
|                       | <i>Comamonas</i>       | <i>Comamonas kerstersii</i>                       | 1              | absent           |
|                       | <i>Desulfovibrio</i>   | <i>Desulfovibrio desulfuricans</i>                | 1              | absent           |
|                       |                        | <i>Desulfovibrio fairfieldensis</i>               | 3              | absent           |
|                       | <i>Enterobacter</i>    | <i>Enterobacter cowanii</i>                       | 3              | absent           |
|                       |                        | <i>Enterobacter hormaechei</i>                    | 20             | absent           |
|                       |                        | <i>Enterobacter kobei</i>                         | 190            | absent           |
|                       | <i>Haemophilus</i>     | <i>Haemophilus parahaemolyticus</i>               | 6              | present          |
|                       | <i>Moraxella</i>       | <i>Moraxella nonliquefaciens</i>                  | 11             | absent           |
|                       |                        | <i>Moraxella osloensis</i>                        | 9              | absent           |
|                       | <i>Neisseria</i>       | <i>Neisseria perflava</i>                         | 2              | absent           |
|                       |                        | <i>Neisseria subflava</i>                         | 1              | absent           |
|                       | <i>Ochrobactrum</i>    | <i>Ochrobactrum grignonense</i>                   | 1              | absent           |
|                       |                        | <i>Ochrobactrum intermedium</i>                   | 1              | absent           |
|                       | <i>Olsenella</i>       | <i>Olsenella uli</i>                              | 1              | absent           |
|                       | <i>Pandoraea</i>       | <i>Pandoraea pulmonicola</i>                      | 9              | absent           |
|                       | <i>Pasteurella</i>     | <i>Pasteurella aerogenes</i>                      | 1              | present          |
|                       |                        | <i>Pasteurella canis</i>                          | 6              | absent           |
|                       | <i>Pseudomonas</i>     | <i>Pseudomonas geniculata</i>                     | 2              | absent           |
|                       |                        | <i>Pseudomonas hibiscicola</i>                    | 2              | absent           |
|                       |                        | <i>Pseudomonas mosselii</i>                       | 11             | absent           |
|                       |                        | <i>Pseudomonas pseudoalcaligenes</i>              | 1              | present          |
|                       | <i>Roseomonas</i>      | <i>Roseomonas mucosa</i>                          | 2              | absent           |
|                       | <i>Serratia</i>        | <i>Serratia ureilytica</i>                        | 1              | absent           |
|                       | <i>Shigella</i>        | <i>Shigella dysenteriae</i>                       | 1              | absent           |
|                       | <i>Vibrio</i>          | <i>Vibrio alginolyticus</i>                       | 3              | present          |
|                       |                        | <i>Vibrio parahaemolyticus</i>                    | 1              | present          |
|                       |                        | <i>Vibrio vulnificus</i>                          | 1              | present          |

19 **Table S3. List of 21 species of 670 isolates that were confirmed by a second phenotypic identification; 3 of these**  
 20 **species were absent from our MALDI-TOF database and 18 were present.**

| Phylum                | Genus                      | Bacteria species needed 2 <sup>nd</sup> PID* | N° of isolates              | N° isolates, CPI**<br>period | N° isolates, MALDI<br>period | Our MALDI-TOF database |         |
|-----------------------|----------------------------|----------------------------------------------|-----------------------------|------------------------------|------------------------------|------------------------|---------|
| <i>Actinobacteria</i> | <i>Corynebacterium</i>     | <i>Corynebacterium aurimucosum</i>           | 1                           | 0                            | 1                            | present                |         |
|                       |                            | <i>Corynebacterium sp. A</i>                 | 52                          | 52                           | 0                            | absent                 |         |
|                       |                            | <i>Corynebacterium sp. G</i>                 | 1                           | 1                            | 0                            | absent                 |         |
|                       |                            | <i>Corynebacterium striatum</i>              | 2                           | 0                            | 2                            | present                |         |
|                       |                            | <i>Corynebacterium tuberculostearicum</i>    | 2                           | 0                            | 2                            | present                |         |
| <i>Firmicutes</i>     | <i>Bacillus</i>            | <i>Bacillus cereus</i>                       | 1                           | 0                            | 1                            | present                |         |
|                       |                            | <i>Lactobacillus aviarius</i>                | 1                           | 1                            | 0                            | present                |         |
|                       | <i>Peptoniphilus</i>       | <i>Peptoniphilus harei</i>                   | 1                           | 1                            | 0                            | present                |         |
|                       | <i>Streptococcus</i>       | <i>Streptococcus intermedius</i>             | 1                           | 1                            | 0                            | present                |         |
|                       |                            | <i>Streptococcus oralis</i>                  | 2                           | 0                            | 2                            | present                |         |
|                       |                            | <i>Streptococcus pneumoniae</i>              | 1                           | 1                            | 0                            | present                |         |
|                       |                            | <i>Streptococcus sp. 'group G'</i>           | 596                         | 561                          | 35                           | absent                 |         |
| <i>Veillonella</i>    | <i>Veillonella parvula</i> | 1                                            | 0                           | 1                            | present                      |                        |         |
| <i>Fusobacteria</i>   | <i>Fusobacterium</i>       | <i>Fusobacterium nucleatum</i>               | 1                           | 1                            | 0                            | present                |         |
| <i>Proteobacteria</i> | <i>Acinetobacter</i>       | <i>Acinetobacter guillouiae</i>              | 1                           | 0                            | 1                            | present                |         |
|                       |                            | <i>Arthrobacter</i>                          | <i>Arthrobacter ramosus</i> | 1                            | 0                            | 1                      | present |
|                       |                            | <i>Citrobacter</i>                           | <i>Citrobacter braakii</i>  | 1                            | 0                            | 1                      | present |
|                       | <i>Enterobacter</i>        | <i>Enterobacter aerogenes</i>                | 1                           | 1                            | 0                            | present                |         |
|                       |                            | <i>Enterobacter kobei</i>                    | 1                           | 0                            | 1                            | present                |         |
|                       | <i>Pseudomonas</i>         | <i>Pseudomonas monteilii</i>                 | 1                           | 0                            | 1                            | present                |         |
|                       |                            | <i>Pseudomonas nitroreducens</i>             | 1                           | 0                            | 1                            | present                |         |

21 PID\*: phenotypic identification; CPI\*\*: conventional phenotypic identification (Gram staining, API, Vitek 2 system  
 22 identification).

23  
24

**Table S4. List of 339 species of 1,273 isolates that were confirmed using molecular identification; 24 of these species were absent from our MALDI-TOF database and 63 from the Brüker database.**

| Phylum                | Genus                  | Bacterial species confirmed using molecular identification | N° of isolates (n=)                   | N° of isolates, CPI* period | N° of isolates, MALDI-TOF period | Our MALDI-TOF database | MALDI-TOF database (Brüker) |         |
|-----------------------|------------------------|------------------------------------------------------------|---------------------------------------|-----------------------------|----------------------------------|------------------------|-----------------------------|---------|
| <i>Actinobacteria</i> | <i>Actinobaculum</i>   | <i>Actinobaculum schaalii</i>                              | 10                                    | 5                           | 5                                | present                | present                     |         |
|                       |                        | <i>Actinomyces</i>                                         |                                       |                             |                                  |                        |                             |         |
|                       |                        | <i>Actinomyces europaeus</i>                               | 3                                     | 1                           | 2                                | present                | present                     |         |
|                       |                        | <i>Actinomyces georgiae</i>                                | 3                                     | 1                           | 2                                | absent                 | absent                      |         |
|                       |                        | <i>Actinomyces lingnae</i>                                 | 1                                     | 0                           | 1                                | absent                 | absent                      |         |
|                       |                        | <i>Actinomyces meyeri</i>                                  | 1                                     | 1                           | 0                                | present                | present                     |         |
|                       |                        | <i>Actinomyces naeslundii</i>                              | 10                                    | 7                           | 3                                | present                | present                     |         |
|                       |                        | <i>Actinomyces neuii</i>                                   | 9                                     | 5                           | 4                                | present                | present                     |         |
|                       |                        | <i>Actinomyces odontolyticus</i>                           | 10                                    | 7                           | 3                                | present                | present                     |         |
|                       |                        | <i>Actinomyces oris</i>                                    | 1                                     | 0                           | 1                                | present                | absent                      |         |
|                       |                        | <i>Actinomyces radingae</i>                                | 5                                     | 3                           | 2                                | present                | present                     |         |
|                       |                        | <i>Actinomyces sp oral</i>                                 | 2                                     | 2                           | 0                                | absent                 | absent                      |         |
|                       |                        | <i>Actinomyces turicensis</i>                              | 7                                     | 1                           | 6                                | present                | present                     |         |
|                       |                        | <i>Actinomyces urogenitalis</i>                            | 2                                     | 0                           | 2                                | present                | present                     |         |
|                       |                        | <i>Actinomyces viscosus</i>                                | 4                                     | 2                           | 2                                | present                | present                     |         |
|                       |                        | <i>Arcanobacterium</i>                                     | <i>Arcanobacterium bernardiae</i>     | 3                           | 1                                | 2                      | present                     | present |
|                       |                        |                                                            | <i>Arcanobacterium haemolyticum</i>   | 4                           | 2                                | 2                      | present                     | present |
|                       |                        | <i>Arthrobacter</i>                                        | <i>Arthrobacter cummingsii</i>        | 5                           | 4                                | 1                      | present                     | present |
|                       |                        |                                                            | <i>Arthrobacter nitroguajacolicus</i> | 1                           | 1                                | 0                      | absent                      | absent  |
|                       |                        |                                                            | <i>Arthrobacter oxydans</i>           | 1                           | 1                                | 0                      | present                     | present |
|                       |                        | <i>Atopobium</i>                                           | <i>Atopobium parvulum</i>             | 9                           | 3                                | 6                      | present                     | present |
|                       |                        |                                                            | <i>Atopobium vaginae</i>              | 1                           | 1                                | 0                      | present                     | present |
|                       |                        | <i>Bifidobacterium</i>                                     | <i>Bifidobacterium breve</i>          | 3                           | 3                                | 0                      | present                     | present |
|                       |                        |                                                            | <i>Bifidobacterium scardovii</i>      | 1                           | 1                                | 0                      | present                     | absent  |
|                       |                        | <i>Brachybacterium</i>                                     | <i>Brachybacterium muris</i>          | 1                           | 0                                | 1                      | present                     | present |
|                       |                        |                                                            | <i>Brachybacterium sacelli</i>        | 1                           | 0                                | 1                      | absent                      | absent  |
|                       |                        | <i>Brevibacterium</i>                                      | <i>Brevibacterium casei</i>           | 3                           | 2                                | 1                      | present                     | present |
|                       |                        |                                                            | <i>Brevibacterium massiliense</i>     | 1                           | 1                                | 0                      | present                     | absent  |
|                       |                        |                                                            | <i>Brevibacterium otitidis</i>        | 1                           | 1                                | 0                      | absent                      | absent  |
|                       |                        |                                                            | <i>Brevibacterium paucivorans</i>     | 2                           | 1                                | 1                      | present                     | present |
|                       |                        |                                                            | <i>Brevibacterium ravenspurgense</i>  | 1                           | 1                                | 0                      | present                     | present |
|                       |                        |                                                            | <i>Brevibacterium stationis</i>       | 1                           | 0                                | 1                      | present                     | absent  |
|                       |                        | <i>Cellulomonas</i>                                        | <i>Cellulomonas hominis</i>           | 1                           | 0                                | 1                      | present                     | absent  |
|                       | <i>Clavibacter</i>     | <i>Clavibacter michiganensis</i>                           | 1                                     | 0                           | 1                                | present                | present                     |         |
|                       | <i>Corynebacterium</i> | <i>Corynebacterium accolens</i>                            | 2                                     | 1                           | 1                                | present                | present                     |         |
|                       |                        | <i>Corynebacterium afermentans</i>                         | 4                                     | 3                           | 1                                | present                | present                     |         |
|                       |                        | <i>Corynebacterium amycolatum</i>                          | 42                                    | 15                          | 27                               | present                | present                     |         |
|                       |                        | <i>Corynebacterium argentoratense</i>                      | 2                                     | 0                           | 2                                | present                | present                     |         |
|                       |                        | <i>Corynebacterium aurimucosum</i>                         | 10                                    | 6                           | 4                                | present                | present                     |         |



| Phylum | Genus                 | Bacterial species confirmed using molecular identification | N° of isolates (n=) | N° of isolates, CPI* period | N° of isolates, MALDI-TOF period | Our MALDI-TOF database | MALDI-TOF database (Bruker) |
|--------|-----------------------|------------------------------------------------------------|---------------------|-----------------------------|----------------------------------|------------------------|-----------------------------|
|        |                       | <i>Corynebacterium auris</i>                               | 1                   | 1                           | 0                                | present                | present                     |
|        |                       | <i>Corynebacterium auriscanis</i>                          | 3                   | 3                           | 0                                | present                | present                     |
|        |                       | <i>Corynebacterium bovis</i>                               | 1                   | 1                           | 0                                | present                | present                     |
|        |                       | <i>Corynebacterium confusum</i>                            | 1                   | 0                           | 1                                | present                | present                     |
|        |                       | <i>Corynebacterium coyleae</i>                             | 4                   | 0                           | 4                                | present                | present                     |
|        |                       | <i>Corynebacterium diphtheriae</i>                         | 1                   | 1                           | 0                                | present                | present                     |
|        |                       | <i>Corynebacterium durum</i>                               | 1                   | 1                           | 0                                | present                | present                     |
|        |                       | <i>Corynebacterium fastidiosum</i>                         | 1                   | 0                           | 1                                | absent                 | absent                      |
|        |                       | <i>Corynebacterium genitalium</i>                          | 5                   | 4                           | 1                                | absent                 | absent                      |
|        |                       | <i>Corynebacterium glucuronolyticum</i>                    | 3                   | 1                           | 2                                | present                | present                     |
|        |                       | <i>Corynebacterium imitans</i>                             | 1                   | 0                           | 1                                | present                | present                     |
|        |                       | <i>Corynebacterium jeikeium</i>                            | 13                  | 8                           | 5                                | present                | present                     |
|        |                       | <i>Corynebacterium kroppenstedtii</i>                      | 1                   | 0                           | 1                                | present                | present                     |
|        |                       | <i>Corynebacterium macginleyi</i>                          | 2                   | 1                           | 1                                | present                | present                     |
|        |                       | <i>Corynebacterium minutissimum</i>                        | 4                   | 2                           | 2                                | present                | present                     |
|        |                       | <i>Corynebacterium mucifaciens</i>                         | 3                   | 0                           | 3                                | present                | present                     |
|        |                       | <i>Corynebacterium propinquum</i>                          | 9                   | 8                           | 1                                | present                | present                     |
|        |                       | <i>Corynebacterium pseudodiphtheriticum</i>                | 10                  | 9                           | 1                                | present                | present                     |
|        |                       | <i>Corynebacterium pseudogenitalium</i>                    | 1                   | 0                           | 1                                | present                | absent                      |
|        |                       | <i>Corynebacterium riegelii</i>                            | 1                   | 0                           | 1                                | present                | present                     |
|        |                       | <i>Corynebacterium simulans</i>                            | 4                   | 2                           | 2                                | present                | present                     |
|        |                       | <i>Corynebacterium striatum</i>                            | 12                  | 5                           | 7                                | present                | present                     |
|        |                       | <i>Corynebacterium tuberculostearicum</i>                  | 31                  | 6                           | 25                               | present                | present                     |
|        |                       | <i>Corynebacterium urealyticum</i>                         | 4                   | 3                           | 1                                | present                | present                     |
|        |                       | <i>Corynebacterium ureicelerivorans</i>                    | 1                   | 0                           | 1                                | present                | present                     |
|        | <i>Dermabacter</i>    | <i>Dermabacter hominis</i>                                 | 15                  | 10                          | 5                                | present                | present                     |
|        | <i>Dietzia</i>        | <i>Dietzia cinnamea</i>                                    | 1                   | 1                           | 0                                | present                | present                     |
|        | <i>Eggerthella</i>    | <i>Eggerthella lenta</i>                                   | 6                   | 6                           | 0                                | present                | present                     |
|        | <i>Gardnerella</i>    | <i>Gardnerella vaginalis</i>                               | 2                   | 2                           | 0                                | present                | present                     |
|        | <i>Janibacter</i>     | <i>Janibacter hoylei</i>                                   | 1                   | 0                           | 1                                | present                | absent                      |
|        | <i>Kocuria</i>        | <i>Kocuria rhizophila</i>                                  | 1                   | 1                           | 0                                | present                | present                     |
|        |                       | <i>Kocuria rosea</i>                                       | 1                   | 1                           | 0                                | present                | present                     |
|        | <i>Kytococcus</i>     | <i>Kytococcus schroeteri</i>                               | 1                   | 1                           | 0                                | present                | absent                      |
|        | <i>Microbacterium</i> | <i>Microbacterium aurum</i>                                | 2                   | 1                           | 1                                | present                | present                     |
|        |                       | <i>Microbacterium chocolatum</i>                           | 1                   | 1                           | 0                                | absent                 | absent                      |
|        |                       | <i>Microbacterium flavum</i>                               | 1                   | 0                           | 1                                | present                | present                     |
|        |                       | <i>Microbacterium liquefaciens</i>                         | 1                   | 1                           | 0                                | present                | present                     |
|        |                       | <i>Microbacterium oxydans</i>                              | 1                   | 0                           | 1                                | present                | present                     |
|        |                       | <i>Microbacterium paraoxydans</i>                          | 2                   | 2                           | 0                                | present                | absent                      |
|        | <i>Micrococcus</i>    | <i>Micrococcus luteus</i>                                  | 4                   | 3                           | 1                                | present                | present                     |
|        | <i>Nesterenkonia</i>  | <i>Nesterenkonia lacusekhoensis</i>                        | 1                   | 0                           | 1                                | present                | absent                      |

| Phylum                 | Genus                                        | Bacterial species confirmed using molecular identification | N° of isolates (n=)                   | N° of isolates, CPI* period | N° of isolates, MALDI-TOF period | Our MALDI-TOF database | MALDI-TOF database (Bruker) |         |
|------------------------|----------------------------------------------|------------------------------------------------------------|---------------------------------------|-----------------------------|----------------------------------|------------------------|-----------------------------|---------|
| Bacteroidetes          | <i>Nocardia</i>                              | <i>Nocardia abscessus</i>                                  | 6                                     | 3                           | 3                                | present                | present                     |         |
|                        |                                              | <i>Nocardia brasiliensis</i>                               | 1                                     | 0                           | 1                                | present                | absent                      |         |
|                        |                                              | <i>Nocardia cyriacigeorgica</i>                            | 3                                     | 2                           | 1                                | present                | present                     |         |
|                        |                                              | <i>Nocardia farcinica</i>                                  | 5                                     | 3                           | 2                                | present                | present                     |         |
|                        |                                              | <i>Nocardia otitidiscaviarum</i>                           | 2                                     | 2                           | 0                                | present                | present                     |         |
|                        |                                              | <i>Nocardia transvalensis</i>                              | 1                                     | 1                           | 0                                | present                | present                     |         |
|                        | <i>Ochrobactrum</i>                          | <i>Ochrobactrum anthropi</i>                               | 3                                     | 0                           | 3                                | present                | present                     |         |
|                        | <i>Olsenella</i>                             | <i>Olsenella uli</i>                                       | 1                                     | 0                           | 1                                | present                | absent                      |         |
|                        | <i>Propionibacterium</i>                     | <i>Propionibacterium acnes</i>                             | 19                                    | 16                          | 3                                | present                | present                     |         |
|                        |                                              | <i>Propionibacterium avidum</i>                            | 13                                    | 12                          | 1                                | present                | present                     |         |
|                        |                                              | <i>Propionibacterium granulosum</i>                        | 2                                     | 1                           | 1                                | present                | present                     |         |
|                        |                                              | <i>Propionibacterium propionicum</i>                       | 3                                     | 1                           | 2                                | present                | present                     |         |
|                        |                                              | <i>Propionimicrobium lymphophilum</i>                      | 2                                     | 1                           | 1                                | present                | present                     |         |
|                        | <i>Rothia</i>                                | <i>Rothia dentocariosa</i>                                 | 4                                     | 3                           | 1                                | present                | present                     |         |
|                        |                                              | <i>Rothia mucilaginoso</i>                                 | 2                                     | 1                           | 1                                | present                | present                     |         |
|                        | <i>Trueperella</i>                           | <i>Trueperella abortusis</i>                               | 1                                     | 1                           | 0                                | present                | absent                      |         |
|                        | <i>Turicella</i>                             | <i>Turicella otitidis</i>                                  | 1                                     | 0                           | 1                                | present                | present                     |         |
|                        | <i>Zimmermannella</i>                        | <i>Zimmermannella bifida</i>                               | 1                                     | 1                           | 0                                | absent                 | absent                      |         |
|                        | <i>Bacteroidetes</i>                         | <i>Alistipes</i>                                           | <i>Alistipes finegoldii</i>           | 1                           | 1                                | 0                      | present                     | present |
|                        |                                              | <i>Bacteroides</i>                                         | <i>Bacteroides dorei</i>              | 1                           | 1                                | 0                      | absent                      | absent  |
|                        |                                              |                                                            | <i>Bacteroides fragilis</i>           | 1                           | 1                                | 0                      | present                     | present |
|                        |                                              |                                                            | <i>Bacteroides heparinolyticus</i>    | 3                           | 1                                | 2                      | present                     | absent  |
|                        |                                              |                                                            | <i>Bacteroides ovatus</i>             | 1                           | 1                                | 0                      | present                     | present |
|                        |                                              |                                                            | <i>Bacteroides pyogenes</i>           | 1                           | 1                                | 0                      | present                     | absent  |
|                        |                                              | <i>Butyricimonas</i>                                       | <i>Butyricimonas virosa</i>           | 2                           | 0                                | 2                      | present                     | present |
|                        |                                              | <i>Capnocytophaga</i>                                      | <i>Capnocytophaga canimorsus</i>      | 1                           | 1                                | 0                      | present                     | present |
|                        |                                              |                                                            | <i>Capnocytophaga gingivalis</i>      | 1                           | 1                                | 0                      | present                     | present |
|                        |                                              |                                                            | <i>Capnocytophaga sputigena</i>       | 4                           | 4                                | 0                      | present                     | present |
|                        |                                              | <i>Chryseobacterium</i>                                    | <i>Chryseobacterium gleum</i>         | 1                           | 0                                | 1                      | present                     | absent  |
|                        |                                              |                                                            | <i>Chryseobacterium hominis</i>       | 1                           | 0                                | 1                      | present                     | absent  |
|                        |                                              |                                                            | <i>Chryseobacterium indologenes</i>   | 3                           | 3                                | 0                      | present                     | present |
|                        |                                              |                                                            | <i>Chryseobacterium vrystaatense</i>  | 1                           | 0                                | 1                      | absent                      | absent  |
|                        |                                              | <i>Elizabethkingia</i>                                     | <i>Elizabethkingia meningoseptica</i> | 1                           | 1                                | 0                      | present                     | present |
| <i>Parabacteroides</i> | <i>Parabacteroides distasonis</i>            | 1                                                          | 1                                     | 0                           | present                          | present                |                             |         |
| <i>Peptoniphilus</i>   | <i>Candidatus Peptoniphilus massiliensis</i> | 1                                                          | 0                                     | 1                           | absent                           | absent                 |                             |         |
| <i>Porphyromonas</i>   | <i>Porphyromonas asaccharolytica</i>         | 2                                                          | 2                                     | 0                           | present                          | present                |                             |         |
|                        | <i>Porphyromonas uenonis</i>                 | 4                                                          | 4                                     | 0                           | present                          | absent                 |                             |         |
| <i>Prevotella</i>      | <i>Candidatus Prevotella conceptionensis</i> | 1                                                          | 1                                     | 0                           | present                          | absent                 |                             |         |
|                        | <i>Prevotella bivia</i>                      | 1                                                          | 1                                     | 0                           | present                          | present                |                             |         |
|                        | <i>Prevotella buccae</i>                     | 1                                                          | 1                                     | 0                           | present                          | present                |                             |         |

| Phylum                          | Genus                              | Bacterial species confirmed using molecular identification | N° of isolates (n=)               | N° of isolates, CPI* period | N° of isolates, MALDI-TOF period | Our MALDI-TOF database | MALDI-TOF database (Brüker) |         |
|---------------------------------|------------------------------------|------------------------------------------------------------|-----------------------------------|-----------------------------|----------------------------------|------------------------|-----------------------------|---------|
| Firmicutes                      |                                    | <i>Prevotella corporis</i>                                 | 1                                 | 0                           | 1                                | present                | present                     |         |
|                                 |                                    | <i>Prevotella intermedia</i>                               | 3                                 | 3                           | 0                                | present                | present                     |         |
|                                 |                                    | <i>Prevotella loescheii</i>                                | 2                                 | 0                           | 2                                | absent                 | absent                      |         |
|                                 |                                    | <i>Prevotella oralis</i>                                   | 1                                 | 1                           | 0                                | present                | present                     |         |
|                                 |                                    | <i>Prevotella oris</i>                                     | 2                                 | 2                           | 0                                | present                | present                     |         |
|                                 | <i>Wautersiella</i>                | <i>Wautersiella falsenii</i>                               | 2                                 | 1                           | 1                                | present                | present                     |         |
|                                 | <i>Abiotrophia</i>                 | <i>Abiotrophia defectiva</i>                               | 2                                 | 1                           | 1                                | present                | present                     |         |
|                                 | <i>Aerococcus</i>                  | <i>Aerococcus urinae</i>                                   | 4                                 | 4                           | 0                                | present                | present                     |         |
|                                 |                                    | <i>Aerococcus viridans</i>                                 | 1                                 | 0                           | 1                                | present                | present                     |         |
|                                 | <i>Aerosphaera</i>                 | <i>Aerosphaera taetra</i>                                  | 1                                 | 1                           | 0                                | present                | absent                      |         |
|                                 | <i>Anaerococcus</i>                | <i>Anaerococcus octavius</i>                               | 2                                 | 2                           | 0                                | present                | present                     |         |
|                                 |                                    | <i>Anaerococcus prevotii</i>                               | 1                                 | 0                           | 1                                | present                | present                     |         |
|                                 |                                    | <i>Anaerococcus vaginalis</i>                              | 3                                 | 2                           | 1                                | present                | present                     |         |
|                                 | <i>Anaerotruncus</i>               | <i>Anaerotruncus colihominis</i>                           | 2                                 | 1                           | 1                                | present                | absent                      |         |
|                                 | <i>Bacillus</i>                    | <i>Bacillus cereus</i>                                     | 18                                | 12                          | 6                                | present                | present                     |         |
|                                 |                                    | <i>Bacillus circulans</i>                                  | 2                                 | 1                           | 1                                | present                | present                     |         |
|                                 |                                    | <i>Bacillus coagulans</i>                                  | 2                                 | 1                           | 1                                | present                | present                     |         |
|                                 |                                    | <i>Bacillus flexus</i>                                     | 1                                 | 1                           | 0                                | present                | present                     |         |
|                                 |                                    | <i>Bacillus licheniformis</i>                              | 6                                 | 2                           | 4                                | present                | present                     |         |
|                                 |                                    | <i>Bacillus megaterium</i>                                 | 1                                 | 1                           | 0                                | present                | present                     |         |
|                                 |                                    | <i>Bacillus mycoides</i>                                   | 1                                 | 1                           | 0                                | present                | present                     |         |
|                                 |                                    | <i>Bacillus pumilus</i>                                    | 1                                 | 0                           | 1                                | present                | present                     |         |
|                                 |                                    | <i>Bacillus simplex</i>                                    | 4                                 | 2                           | 2                                | present                | present                     |         |
|                                 |                                    | <i>Bacillus subtilis</i>                                   | 1                                 | 0                           | 1                                | present                | present                     |         |
|                                 |                                    | <i>Lysinibacillus massiliensis</i>                         | 1                                 | 0                           | 1                                | present                | absent                      |         |
|                                 |                                    | <i>Catabacter</i>                                          | <i>Catabacter hongkongensis</i>   | 1                           | 1                                | 0                      | absent                      | absent  |
|                                 |                                    | <i>Clostridium</i>                                         | <i>Clostridium aldenense</i>      | 1                           | 0                                | 1                      | present                     | present |
|                                 |                                    |                                                            | <i>Clostridium botulinum</i>      | 2                           | 2                                | 0                      | present                     | absent  |
|                                 |                                    |                                                            | <i>Clostridium celerecrescens</i> | 1                           | 0                                | 1                      | present                     | present |
|                                 | <i>Clostridium clostridioforme</i> |                                                            | 2                                 | 2                           | 0                                | present                | present                     |         |
|                                 | <i>Clostridium hathewayi</i>       |                                                            | 2                                 | 2                           | 0                                | present                | present                     |         |
|                                 | <i>Clostridium lituseburense</i>   |                                                            | 1                                 | 1                           | 0                                | present                | absent                      |         |
|                                 | <i>Clostridium perfringens</i>     |                                                            | 1                                 | 1                           | 0                                | present                | present                     |         |
| <i>Clostridium ramosum</i>      | 1                                  |                                                            | 0                                 | 1                           | present                          | present                |                             |         |
| <i>Clostridium subterminale</i> | 1                                  |                                                            | 0                                 | 1                           | present                          | present                |                             |         |
| <i>Clostridium tertium</i>      | 3                                  |                                                            | 3                                 | 0                           | present                          | present                |                             |         |
| <i>Dialister</i>                | <i>Dialister micraerophilus</i>    | 1                                                          | 0                                 | 1                           | present                          | present                |                             |         |
| <i>Enterococcus</i>             | <i>Enterococcus avium</i>          | 5                                                          | 2                                 | 3                           | present                          | present                |                             |         |
|                                 | <i>Enterococcus casseliflavus</i>  | 1                                                          | 0                                 | 1                           | present                          | present                |                             |         |
|                                 | <i>Enterococcus faecalis</i>       | 6                                                          | 5                                 | 1                           | present                          | present                |                             |         |
|                                 | <i>Enterococcus faecium</i>        | 4                                                          | 0                                 | 4                           | present                          | present                |                             |         |
|                                 | <i>Enterococcus gallinarum</i>     | 1                                                          | 1                                 | 0                           | present                          | present                |                             |         |
|                                 | <i>Enterococcus raffinosus</i>     | 1                                                          | 0                                 | 1                           | present                          | present                |                             |         |

| Phylum | Genus                 | Bacterial species confirmed using molecular identification | N° of isolates (n=)             | N° of isolates, CPI* period | N° of isolates, MALDI-TOF period | Our MALDI-TOF database | MALDI-TOF database (Bruker) |
|--------|-----------------------|------------------------------------------------------------|---------------------------------|-----------------------------|----------------------------------|------------------------|-----------------------------|
|        | <i>Erwinia</i>        | <i>Erwinia rhapontici</i>                                  | 1                               | 1                           | 0                                | present                | present                     |
|        | <i>Finegoldia</i>     | <i>Finegoldia magna</i>                                    | 6                               | 6                           | 0                                | present                | present                     |
|        | <i>Flavonifractor</i> | <i>Flavonifractor plautii</i>                              | 5                               | 5                           | 0                                | present                | absent                      |
|        | <i>Gemella</i>        | <i>Gemella haemolysans</i>                                 | 2                               | 0                           | 2                                | present                | present                     |
|        |                       | <i>Gemella morbillorum</i>                                 | 2                               | 1                           | 1                                | present                | present                     |
|        | <i>Granulicatella</i> | <i>Granulicatella adiacens</i>                             | 3                               | 1                           | 2                                | present                | present                     |
|        |                       | <i>Granulicatella elegans</i>                              | 1                               | 1                           | 0                                | present                | present                     |
|        |                       | <i>Granulicatella para-adiacens</i>                        | 1                               | 0                           | 1                                | present                | absent                      |
|        | <i>Lactobacillus</i>  | <i>Lactobacillus casei</i>                                 | 3                               | 3                           | 0                                | present                | present                     |
|        |                       | <i>Lactobacillus fermentum</i>                             | 1                               | 1                           | 0                                | present                | present                     |
|        |                       | <i>Lactobacillus gasseri</i>                               | 3                               | 1                           | 2                                | present                | present                     |
|        |                       | <i>Lactobacillus jensenii</i>                              | 1                               | 1                           | 0                                | present                | present                     |
|        |                       | <i>Lactobacillus plantarum</i>                             | 1                               | 1                           | 0                                | present                | present                     |
|        |                       | <i>Lactobacillus rhamnosus</i>                             | 11                              | 9                           | 2                                | present                | present                     |
|        |                       | <i>Lactobacillus sakei</i>                                 | 1                               | 0                           | 1                                | present                | present                     |
|        |                       | <i>Lactobacillus vaginalis</i>                             | 1                               | 1                           | 0                                | present                | absent                      |
|        |                       | <i>Lactobacillus zeae</i>                                  | 2                               | 2                           | 0                                | present                | present                     |
|        |                       | <i>Lactococcus garvieae</i>                                | 1                               | 0                           | 1                                | present                | present                     |
|        |                       | <i>Leclercia</i>                                           | <i>Leclercia adecarboxylata</i> | 4                           | 4                                | 0                      | present                     |
|        | <i>Leuconostoc</i>    | <i>Leuconostoc lactis</i>                                  | 1                               | 1                           | 0                                | present                | present                     |
|        |                       | <i>Leuconostoc mesenteroides</i>                           | 1                               | 0                           | 1                                | present                | present                     |
|        | <i>Listeria</i>       | <i>Listeria monocytogenes</i>                              | 2                               | 2                           | 0                                | present                | present                     |
|        | <i>Lysinibacillus</i> | <i>Lysinibacillus sphaericus</i>                           | 1                               | 1                           | 0                                | present                | present                     |
|        | <i>Parvimonas</i>     | <i>Parvimonas micra</i>                                    | 7                               | 7                           | 0                                | present                | present                     |
|        | <i>Peptoniphilus</i>  | <i>Peptoniphilus harei</i>                                 | 3                               | 2                           | 1                                | present                | present                     |
|        |                       | <i>Peptoniphilus indolicus</i>                             | 1                               | 0                           | 1                                | present                | present                     |
|        |                       | <i>Peptoniphilus lacrimalis</i>                            | 1                               | 1                           | 0                                | present                | absent                      |
|        | <i>Ruminococcus</i>   | <i>Ruminococcus gnavus</i>                                 | 1                               | 1                           | 0                                | present                | present                     |
|        | <i>Sporosarcina</i>   | <i>Sporosarcina globispora</i>                             | 1                               | 1                           | 0                                | present                | present                     |
|        | <i>Staphylococcus</i> | <i>Staphylococcus aureus</i>                               | 7                               | 5                           | 2                                | present                | present                     |
|        |                       | <i>Staphylococcus capitis</i>                              | 1                               | 1                           | 0                                | present                | present                     |
|        |                       | <i>Staphylococcus caprae</i>                               | 3                               | 0                           | 3                                | present                | present                     |
|        |                       | <i>Staphylococcus cohnii</i>                               | 4                               | 1                           | 3                                | present                | present                     |
|        |                       | <i>Staphylococcus epidermidis</i>                          | 13                              | 9                           | 4                                | present                | present                     |
|        |                       | <i>Staphylococcus equorum</i>                              | 1                               | 0                           | 1                                | present                | present                     |
|        |                       | <i>Staphylococcus haemolyticus</i>                         | 1                               | 0                           | 1                                | present                | present                     |
|        |                       | <i>Staphylococcus hominis</i>                              | 2                               | 0                           | 2                                | present                | present                     |
|        |                       | <i>Staphylococcus intermedius</i>                          | 1                               | 1                           | 0                                | present                | present                     |
|        |                       | <i>Staphylococcus lugdunensis</i>                          | 1                               | 0                           | 1                                | present                | present                     |
|        |                       | <i>Staphylococcus pettenkoferi</i>                         | 2                               | 0                           | 2                                | present                | present                     |
|        |                       | <i>Staphylococcus saccharolyticus</i>                      | 2                               | 0                           | 2                                | present                | present                     |
|        |                       | <i>Staphylococcus saprophyticus</i>                        | 2                               | 0                           | 2                                | present                | present                     |

| Phylum                             | Genus                | Bacterial species confirmed using molecular identification | N° of isolates (n=)                | N° of isolates, CPI* period      | N° of isolates, MALDI-TOF period | Our MALDI-TOF database | MALDI-TOF database (Bruker) |         |         |
|------------------------------------|----------------------|------------------------------------------------------------|------------------------------------|----------------------------------|----------------------------------|------------------------|-----------------------------|---------|---------|
| Fusobacteria                       | <i>Streptococcus</i> | <i>Streptococcus anginosus</i>                             | 21                                 | 17                               | 4                                | present                | present                     |         |         |
|                                    |                      | <i>Streptococcus australis</i>                             | 1                                  | 1                                | 0                                | present                | present                     |         |         |
|                                    |                      | <i>Streptococcus constellatus</i>                          | 22                                 | 16                               | 6                                | present                | present                     |         |         |
|                                    |                      | <i>Streptococcus criceti</i>                               | 3                                  | 0                                | 3                                | present                | present                     |         |         |
|                                    |                      | <i>Streptococcus cristatus</i>                             | 1                                  | 1                                | 0                                | present                | present                     |         |         |
|                                    |                      | <i>Streptococcus dysgalactiae</i>                          | 5                                  | 1                                | 4                                | present                | present                     |         |         |
|                                    |                      | <i>Streptococcus gallolyticus</i>                          | 12                                 | 9                                | 3                                | present                | present                     |         |         |
|                                    |                      | <i>Streptococcus gordonii</i>                              | 8                                  | 3                                | 5                                | present                | present                     |         |         |
|                                    |                      | <i>Streptococcus infantarius</i>                           | 4                                  | 4                                | 0                                | present                | present                     |         |         |
|                                    |                      | <i>Streptococcus infantis</i>                              | 9                                  | 3                                | 6                                | present                | present                     |         |         |
|                                    |                      | <i>Streptococcus intermedius</i>                           | 15                                 | 13                               | 2                                | present                | present                     |         |         |
|                                    |                      | <i>Streptococcus lutetiensis</i>                           | 2                                  | 1                                | 1                                | present                | present                     |         |         |
|                                    |                      | <i>Streptococcus massiliensis</i>                          | 2                                  | 2                                | 0                                | present                | present                     |         |         |
|                                    |                      | <i>Streptococcus mitis</i>                                 | 44                                 | 17                               | 27                               | present                | present                     |         |         |
|                                    |                      | <i>Streptococcus mutans</i>                                | 5                                  | 5                                | 0                                | present                | present                     |         |         |
|                                    |                      | <i>Streptococcus oligofermentans</i>                       | 4                                  | 4                                | 0                                | absent                 | absent                      |         |         |
|                                    |                      | <i>Streptococcus oralis</i>                                | 30                                 | 9                                | 21                               | present                | present                     |         |         |
|                                    |                      | <i>Streptococcus parasanguinis</i>                         | 8                                  | 4                                | 4                                | present                | present                     |         |         |
|                                    |                      | <i>Streptococcus pasteurianus</i>                          | 1                                  | 0                                | 1                                | present                | present                     |         |         |
|                                    |                      | <i>Streptococcus peroris</i>                               | 1                                  | 0                                | 1                                | present                | present                     |         |         |
|                                    |                      | <i>Streptococcus pneumoniae</i>                            | 10                                 | 3                                | 7                                | present                | present                     |         |         |
|                                    |                      | <i>Streptococcus pseudopneumoniae</i>                      | 2                                  | 0                                | 2                                | present                | present                     |         |         |
|                                    |                      | <i>Streptococcus pyogenes</i>                              | 3                                  | 1                                | 2                                | present                | present                     |         |         |
|                                    |                      | <i>Streptococcus salivarius</i>                            | 9                                  | 6                                | 3                                | present                | present                     |         |         |
|                                    |                      | <i>Streptococcus sanguinis</i>                             | 7                                  | 5                                | 2                                | present                | present                     |         |         |
|                                    |                      | <i>Streptococcus sp oral</i>                               | 7                                  | 7                                | 0                                | absent                 | absent                      |         |         |
|                                    |                      | <i>Streptococcus thermophilus</i>                          | 8                                  | 5                                | 3                                | present                | present                     |         |         |
|                                    |                      | <i>Streptococcus vestibularis</i>                          | 4                                  | 4                                | 0                                | present                | present                     |         |         |
|                                    |                      |                                                            | <i>Turicibacter</i>                | <i>Turicibacter sanguinis</i>    | 1                                | 1                      | 0                           | present | absent  |
|                                    |                      |                                                            | <i>Veillonella</i>                 | <i>Veillonella parvula</i>       | 1                                | 1                      | 0                           | present | present |
|                                    |                      |                                                            | <i>Weissella</i>                   | <i>Weissella cibaria</i>         | 1                                | 1                      | 0                           | absent  | absent  |
|                                    |                      | Fusobacteria                                               | <i>Fusobacterium</i>               | <i>Fusobacterium naviforme</i>   | 2                                | 2                      | 0                           | present | present |
|                                    |                      |                                                            |                                    | <i>Fusobacterium necrophorum</i> | 6                                | 6                      | 0                           | present | present |
| <i>Fusobacterium nucleatum</i>     | 12                   |                                                            |                                    | 12                               | 0                                | present                | present                     |         |         |
| <i>Fusobacterium periodonticum</i> | 1                    |                                                            |                                    | 1                                | 0                                | present                | absent                      |         |         |
|                                    | <i>Leptotrichia</i>  | <i>Leptotrichia trevisanii</i>                             | 5                                  | 4                                | 1                                | present                | absent                      |         |         |
| Proteobacteria                     | <i>Acetobacter</i>   | <i>Acetobacter indonesiensis</i>                           | 2                                  | 2                                | 0                                | absent                 | absent                      |         |         |
|                                    |                      | <i>Achromobacter</i>                                       | <i>Achromobacter xylosoxidans</i>  | 33                               | 27                               | 6                      | present                     | present |         |
|                                    |                      | <i>Acinetobacter</i>                                       | <i>Acinetobacter baumannii</i>     | 1                                | 1                                | 0                      | present                     | present |         |
|                                    |                      |                                                            | <i>Acinetobacter calcoaceticus</i> | 7                                | 1                                | 6                      | present                     | present |         |
|                                    |                      |                                                            | <i>Acinetobacter haemolyticus</i>  | 1                                | 0                                | 1                      | present                     | present |         |
| <i>Acinetobacter johnsonii</i>     | 1                    | 0                                                          | 1                                  | present                          | present                          |                        |                             |         |         |

| Phylum | Genus                  | Bacterial species confirmed using molecular identification | N° of isolates (n=) | N° of isolates, CPI* period | N° of isolates, MALDI-TOF period | Our MALDI-TOF database | MALDI-TOF database (Bruker) |
|--------|------------------------|------------------------------------------------------------|---------------------|-----------------------------|----------------------------------|------------------------|-----------------------------|
|        |                        | <i>Acinetobacter junii</i>                                 | 7                   | 3                           | 4                                | present                | present                     |
|        |                        | <i>Acinetobacter lwoffii</i>                               | 2                   | 2                           | 0                                | present                | present                     |
|        |                        | <i>Acinetobacter parvus</i>                                | 1                   | 1                           | 0                                | present                | present                     |
|        |                        | <i>Acinetobacter pittii</i>                                | 4                   | 0                           | 4                                | present                | present                     |
|        |                        | <i>Acinetobacter schindleri</i>                            | 2                   | 1                           | 1                                | present                | present                     |
|        |                        | <i>Acinetobacter septicus</i>                              | 5                   | 4                           | 1                                | present                | absent                      |
|        |                        | <i>Acinetobacter ursingii</i>                              | 12                  | 3                           | 9                                | present                | present                     |
|        | <i>Actinobacillus</i>  | <i>Actinobacillus ureae</i>                                | 1                   | 1                           | 0                                | present                | present                     |
|        | <i>Aeromonas</i>       | <i>Aeromonas veronii</i>                                   | 1                   | 1                           | 0                                | present                | present                     |
|        | <i>Aggregatibacter</i> | <i>Aggregatibacter aphrophilus</i>                         | 7                   | 5                           | 2                                | present                | present                     |
|        |                        | <i>Aggregatibacter segnis</i>                              | 1                   | 1                           | 0                                | present                | present                     |
|        | <i>Agrobacterium</i>   | <i>Agrobacterium tumefaciens</i>                           | 2                   | 0                           | 2                                | present                | present                     |
|        | <i>Aurantimonas</i>    | <i>Aurantimonas altamirensis</i>                           | 1                   | 0                           | 1                                | present                | absent                      |
|        | <i>Blastomonas</i>     | <i>Blastomonas ursincola</i>                               | 1                   | 1                           | 0                                | present                | present                     |
|        | <i>Bordetella</i>      | <i>Bordetella bronchiseptica</i>                           | 3                   | 2                           | 1                                | present                | present                     |
|        |                        | <i>Bordetella holmesii</i>                                 | 1                   | 0                           | 1                                | present                | present                     |
|        | <i>Brevundimonas</i>   | <i>Brevundimonas diminuta</i>                              | 3                   | 2                           | 1                                | present                | present                     |
|        |                        | <i>Brevundimonas vesicularis</i>                           | 1                   | 0                           | 1                                | present                | present                     |
|        | <i>Brucella</i>        | <i>Brucella melitensis</i>                                 | 2                   | 2                           | 0                                | present                | absent                      |
|        | <i>Burkholderia</i>    | <i>Burkholderia cenocepacia</i>                            | 1                   | 0                           | 1                                | present                | present                     |
|        |                        | <i>Burkholderia cepacia</i>                                | 2                   | 1                           | 1                                | present                | present                     |
|        |                        | <i>Burkholderia fungorum</i>                               | 1                   | 1                           | 0                                | present                | present                     |
|        |                        | <i>Burkholderia multivorans</i>                            | 4                   | 2                           | 2                                | present                | present                     |
|        | <i>Campylobacter</i>   | <i>Campylobacter fetus</i>                                 | 1                   | 1                           | 0                                | present                | present                     |
|        |                        | <i>Campylobacter jejuni</i>                                | 1                   | 1                           | 0                                | present                | present                     |
|        |                        | <i>Campylobacter lari</i>                                  | 1                   | 1                           | 0                                | present                | present                     |
|        |                        | <i>Campylobacter rectus</i>                                | 1                   | 1                           | 0                                | present                | present                     |
|        |                        | <i>Campylobacter ureolyticus</i>                           | 3                   | 3                           | 0                                | present                | present                     |
|        | <i>Delftia</i>         | <i>Delftia tsuruhatensis</i>                               | 7                   | 5                           | 2                                | present                | absent                      |
|        | <i>Desulfovibrio</i>   | <i>Desulfovibrio fairfieldensis</i>                        | 3                   | 0                           | 3                                | present                | absent                      |
|        |                        | <i>Desulfovibrio intestinalis</i>                          | 1                   | 1                           | 0                                | absent                 | absent                      |
|        | <i>Eikenella</i>       | <i>Eikenella corrodens</i>                                 | 9                   | 7                           | 2                                | present                | present                     |
|        | <i>Enterobacter</i>    | <i>Enterobacter aerogenes</i>                              | 3                   | 2                           | 1                                | present                | present                     |
|        |                        | <i>Enterobacter cancerogenus</i>                           | 2                   | 0                           | 2                                | present                | present                     |
|        |                        | <i>Enterobacter cloacae</i>                                | 7                   | 1                           | 6                                | present                | present                     |
|        |                        | <i>Enterobacter hormaechei</i>                             | 3                   | 1                           | 2                                | present                | present                     |
|        |                        | <i>Enterobacter kobei</i>                                  | 3                   | 0                           | 3                                | present                | present                     |
|        | <i>Erwinia</i>         | <i>Erwinia tasmaniensis</i>                                | 1                   | 1                           | 0                                | present                | present                     |
|        | <i>Escherichia</i>     | <i>Escherichia coli</i>                                    | 6                   | 4                           | 2                                | present                | present                     |
|        | <i>Grimontia</i>       | <i>Grimontia hollisae</i>                                  | 1                   | 1                           | 0                                | present                | present                     |
|        | <i>Haematobacter</i>   | <i>Haematobacter massiliensis</i>                          | 3                   | 1                           | 2                                | absent                 | absent                      |
|        | <i>Haemophilus</i>     | <i>Haemophilus influenzae</i>                              | 2                   | 1                           | 1                                | present                | present                     |
|        |                        | <i>Haemophilus parainfluenzae</i>                          | 4                   | 4                           | 0                                | present                | present                     |

| Phylum | Genus                    | Bacterial species confirmed using molecular identification | N° of isolates (n=)       | N° of isolates, CPI* period | N° of isolates, MALDI-TOF period | Our MALDI-TOF database | MALDI-TOF database (Bruker) |
|--------|--------------------------|------------------------------------------------------------|---------------------------|-----------------------------|----------------------------------|------------------------|-----------------------------|
|        | <i>Ignatzschineria</i>   | <i>Ignatzschineria larvae</i>                              | 3                         | 3                           | 0                                | absent                 | absent                      |
|        | <i>Inquilinus</i>        | <i>Inquilinus limosus</i>                                  | 7                         | 6                           | 1                                | present                | present                     |
|        | <i>Kingella</i>          | <i>Kingella kingae</i>                                     | 5                         | 5                           | 0                                | present                | present                     |
|        | <i>Klebsiella</i>        | <i>Klebsiella oxytoca</i>                                  | 2                         | 1                           | 1                                | present                | present                     |
|        |                          | <i>Klebsiella pneumoniae</i>                               | 9                         | 4                           | 5                                | present                | present                     |
|        | <i>Moraxella</i>         | <i>Moraxella catarrhalis</i>                               | 6                         | 6                           | 0                                | present                | present                     |
|        |                          | <i>Moraxella lacunata</i>                                  | 1                         | 1                           | 0                                | present                | present                     |
|        |                          | <i>Moraxella nonliquefaciens</i>                           | 1                         | 1                           | 0                                | present                | present                     |
|        |                          | <i>Moraxella osloensis</i>                                 | 3                         | 0                           | 3                                | present                | present                     |
|        | <i>Morganella</i>        | <i>Morganella morganii</i>                                 | 2                         | 1                           | 1                                | present                | present                     |
|        | <i>Neisseria</i>         | <i>Neisseria canis</i>                                     | 1                         | 1                           | 0                                | present                | present                     |
|        |                          | <i>Neisseria cinerea</i>                                   | 3                         | 1                           | 2                                | present                | present                     |
|        |                          | <i>Neisseria flavescens</i>                                | 2                         | 0                           | 2                                | present                | present                     |
|        |                          | <i>Neisseria gonorrhoeae</i>                               | 1                         | 0                           | 1                                | present                | present                     |
|        |                          | <i>Neisseria mucosa</i>                                    | 1                         | 1                           | 0                                | present                | present                     |
|        |                          | <i>Neisseria sicca</i>                                     | 2                         | 1                           | 1                                | present                | present                     |
|        | <i>Pandoraea</i>         | <i>Pandoraea pnomenus</i>                                  | 1                         | 1                           | 0                                | present                | present                     |
|        |                          | <i>Pandoraea pulmonicola</i>                               | 3                         | 0                           | 3                                | present                | present                     |
|        | <i>Pantoea</i>           | <i>Pantoea ananatis</i>                                    | 5                         | 2                           | 3                                | present                | present                     |
|        |                          | <i>Pantoea brenneri</i>                                    | 1                         | 0                           | 1                                | absent                 | absent                      |
|        |                          | <i>Pantoea eucrina</i>                                     | 1                         | 0                           | 1                                | present                | absent                      |
|        | <i>Pasteurella</i>       | <i>Pasteurella canis</i>                                   | 5                         | 1                           | 4                                | present                | present                     |
|        |                          | <i>Pasteurella multocida</i>                               | 11                        | 10                          | 1                                | present                | present                     |
|        | <i>Pseudochrobactrum</i> | <i>Pseudochrobactrum asaccharolyticum</i>                  | 1                         | 0                           | 1                                | present                | present                     |
|        | <i>Pseudomonas</i>       | <i>Pseudomonas aeruginosa</i>                              | 47                        | 28                          | 19                               | present                | present                     |
|        |                          | <i>Pseudomonas alcaligenes</i>                             | 5                         | 3                           | 2                                | present                | present                     |
|        |                          | <i>Pseudomonas fluorescens</i>                             | 1                         | 0                           | 1                                | present                | present                     |
|        |                          | <i>Pseudomonas lurida</i>                                  | 1                         | 0                           | 1                                | present                | absent                      |
|        |                          | <i>Pseudomonas mendocina</i>                               | 10                        | 0                           | 10                               | present                | present                     |
|        |                          | <i>Pseudomonas mosselii</i>                                | 1                         | 0                           | 1                                | present                | present                     |
|        |                          | <i>Pseudomonas oleovorans</i>                              | 1                         | 1                           | 0                                | present                | present                     |
|        |                          | <i>Pseudomonas oryzihabitans</i>                           | 4                         | 2                           | 2                                | present                | present                     |
|        |                          | <i>Pseudomonas putida</i>                                  | 2                         | 0                           | 2                                | present                | present                     |
|        |                          | <i>Pseudomonas rhodesiae</i>                               | 1                         | 0                           | 1                                | present                | present                     |
|        |                          | <i>Pseudomonas stutzeri</i>                                | 2                         | 1                           | 1                                | present                | present                     |
|        |                          | <i>Pseudomonas syringae</i>                                | 1                         | 0                           | 1                                | present                | present                     |
|        |                          | <i>Rahnella</i>                                            | <i>Rahnella aquatilis</i> | 1                           | 0                                | 1                      | present                     |
|        | <i>Ralstonia</i>         | <i>Ralstonia insidiosa</i>                                 | 1                         | 0                           | 1                                | present                | present                     |
|        |                          | <i>Ralstonia mannitolilytica</i>                           | 2                         | 0                           | 2                                | present                | present                     |
|        | <i>Roseomonas</i>        | <i>Roseomonas genomospecies 5</i>                          | 1                         | 1                           | 0                                | present                | absent                      |
|        |                          | <i>Roseomonas mucosa</i>                                   | 3                         | 3                           | 0                                | present                | present                     |
|        | <i>Rothia</i>            | <i>Rothia aeria</i>                                        | 1                         | 1                           | 0                                | present                | present                     |

| Phylum | Genus                   | Bacterial species confirmed using molecular identification | N° of isolates (n=) | N° of isolates, CPI* | N° of isolates, MALDI-TOF period | Our MALDI-TOF database | MALDI-TOF database (Bruker) |
|--------|-------------------------|------------------------------------------------------------|---------------------|----------------------|----------------------------------|------------------------|-----------------------------|
|        | <i>Salmonella</i>       | <i>Salmonella enterica</i>                                 | 1                   | 0                    | 1                                | present                | present                     |
|        | <i>Serratia</i>         | <i>Serratia nematodiphila</i>                              | 1                   | 0                    | 1                                | absent                 | absent                      |
|        |                         | <i>Serratia rubidaea</i>                                   | 2                   | 0                    | 2                                | present                | present                     |
|        | <i>Slackia</i>          | <i>Slackia exigua</i>                                      | 3                   | 3                    | 0                                | present                | present                     |
|        | <i>Sphingomonas</i>     | <i>Sphingomonas mucosissima</i>                            | 1                   | 1                    | 0                                | present                | present                     |
|        |                         | <i>Sphingomonas paucimobilis</i>                           | 1                   | 1                    | 0                                | present                | present                     |
|        | <i>Stenotrophomonas</i> | <i>Stenotrophomonas maltophilia</i>                        | 11                  | 9                    | 2                                | present                | present                     |

25 CPI\*: conventional phenotypic identification (Gram staining, API, Vitek 2 system identification).



**Table S5. Distribution of the sources of clinical samples for the 48 rare bacterial species identified by phenotypic identification.**

| Phylum                   | Genus                               | Bacteria species                  | Clinical samples                     | N° of Isolates                   |             |   |
|--------------------------|-------------------------------------|-----------------------------------|--------------------------------------|----------------------------------|-------------|---|
| <b>Actinobacteria</b>    | <i>Actinobaculum</i>                | <i>Actinobaculum massiliense</i>  | Joint bone infection                 | 1                                |             |   |
|                          |                                     | <i>Actinomadura</i>               | <i>Actinomadura cremea</i>           | Biopsy                           | 1           |   |
|                          | <i>Actinomyces</i>                  | <i>Actinomyces europaeus</i>      | Abscess                              | 1                                |             |   |
|                          |                                     |                                   | Biopsy                               | 3                                |             |   |
|                          |                                     |                                   | Joint bone infection                 | 2                                |             |   |
|                          |                                     |                                   | Skin wound                           | 4                                |             |   |
|                          |                                     |                                   | Surgical drainage                    | 2                                |             |   |
|                          |                                     |                                   | <i>Actinomyces radidentis</i>        | Bloodstream                      | 3           |   |
|                          |                                     |                                   | <i>Actinomyces radingae</i>          | Abscess                          | 8           |   |
|                          |                                     |                                   | Biopsy                               | 2                                |             |   |
|                          |                                     |                                   | Bloodstream                          | 1                                |             |   |
|                          |                                     |                                   | Cardiac pacemaker                    | 2                                |             |   |
|                          |                                     |                                   | Skin wound                           | 1                                |             |   |
|                          |                                     |                                   | Surgical drainage                    | 6                                |             |   |
|                          |                                     |                                   | <i>Arthrobacter</i>                  | <i>Arthrobacter cumminsii</i>    | Biopsy      | 1 |
|                          |                                     |                                   |                                      |                                  | Bloodstream | 2 |
|                          |                                     |                                   |                                      |                                  | Skin wound  | 1 |
|                          | Surgical drainage                   | 1                                 |                                      |                                  |             |   |
|                          | <i>Brevibacterium</i>               | <i>Brevibacterium luteolum</i>    | Skin wound                           | 1                                |             |   |
|                          |                                     |                                   | <i>Brevibacterium massiliense</i>    | Bloodstream                      | 1           |   |
|                          |                                     |                                   | <i>Brevibacterium paucivorans</i>    | Bloodstream                      | 1           |   |
|                          |                                     |                                   | <i>Brevibacterium ravensturnense</i> | Skin wound                       | 1           |   |
|                          | <i>Corynebacterium</i>              | <i>Corynebacterium auriscanis</i> | Ear                                  | 1                                |             |   |
|                          |                                     |                                   | Skin wounds                          | 1                                |             |   |
|                          |                                     |                                   | Skin wound                           | 1                                |             |   |
|                          |                                     |                                   | <i>Corynebacterium coyleae</i>       | Bloodstream                      | 4           |   |
|                          |                                     |                                   | Urinary tract infection              | 3                                |             |   |
|                          |                                     |                                   | <i>Corynebacterium fastidiosum</i>   | Biopsy                           | 2           |   |
|                          |                                     |                                   | <i>Corynebacterium imitans</i>       | Bloodstream                      | 2           |   |
|                          |                                     |                                   | <i>Corynebacterium mucifaciens</i>   | Bloodstream                      | 2           |   |
|                          |                                     |                                   | Cerebrospinal fluid                  | 3                                |             |   |
|                          |                                     |                                   | <i>Microbacterium</i>                | <i>Microbacterium schleiferi</i> | Cornea      | 1 |
| <i>Pseudoclavibacter</i> | <i>Zimmermannella bifida</i>        | Bloodstream                       | 1                                    |                                  |             |   |
| <i>Varibaculum</i>       | <i>Varibaculum cambriense</i>       | Abscess                           | 1                                    |                                  |             |   |
|                          |                                     | Surgical drainage                 | 1                                    |                                  |             |   |
|                          |                                     | <b>Bacteroidetes</b>              | <i>Alistipes</i>                     | <i>Alistipes finegoldii</i>      | Bloodstream | 3 |
| <i>Bacteroides</i>       | <i>Bacteroides cellulosilyticus</i> | Biopsy                            | 1                                    |                                  |             |   |
|                          |                                     | Bloodstream                       | 2                                    |                                  |             |   |
|                          |                                     | Surgical drainage                 | 1                                    |                                  |             |   |
| <i>Butyricimonas</i>     | <i>Butyricimonas virosa</i>         | Joint bone infection              | 1                                    |                                  |             |   |
| <i>Porphyromonas</i>     | <i>Porphyromonas somerae</i>        | Biopsy                            | 3                                    |                                  |             |   |
|                          |                                     | Cardiac pacemaker                 | 1                                    |                                  |             |   |

| Phylum                | Genus                  | Bacteria species                             | Clinical samples     | N° of Isolates |
|-----------------------|------------------------|----------------------------------------------|----------------------|----------------|
|                       |                        |                                              | Joint bone infection | 3              |
|                       |                        |                                              | Surgical drainage    | 2              |
|                       | <i>Prevotella</i>      | <i>Candidatus Prevotella conceptionensis</i> | Sinusitis            | 3              |
|                       |                        | <i>Prevotella massiliensis</i>               | Bloodstream          | 1              |
| <b>Firmicutes</b>     | <i>Acidaminococcus</i> | <i>Acidaminococcus intestini</i>             | Abscess              | 1              |
|                       |                        |                                              | Surgical drainage    | 1              |
|                       | <i>Anaerococcus</i>    | <i>Anaerococcus lactolyticus</i>             | Bloodstream          | 1              |
|                       |                        |                                              | Surgical drainage    | 2              |
|                       |                        | <i>Anaerococcus octavius</i>                 | Biopsy               | 1              |
|                       |                        |                                              | Bloodstream          | 1              |
|                       |                        |                                              | Joint bone infection | 2              |
|                       |                        |                                              | Pleural biopsy       | 1              |
|                       |                        |                                              | Sinusitis            | 1              |
|                       |                        |                                              | Surgical drainage    | 1              |
|                       | <i>Eubacterium</i>     | <i>Eubacterium tenue</i>                     | Bloodstream          | 1              |
|                       |                        |                                              | Pericardial effusion | 1              |
|                       |                        | <i>Eubacterium yurii</i>                     | Sinusitis            | 1              |
|                       | <i>Facklamia</i>       | <i>Facklamia languida</i>                    | Abscess              | 1              |
|                       | <i>Peptoniphilus</i>   | <i>Peptoniphilus harei</i>                   | Abscess              | 8              |
|                       |                        |                                              | Aortic aneurysm      | 1              |
|                       |                        |                                              | Biopsy               | 32             |
|                       |                        |                                              | Bloodstream          | 10             |
|                       |                        |                                              | Bone marrow culture  | 1              |
|                       |                        |                                              | Joint bone infection | 15             |
|                       |                        |                                              | Joint-Bone           | 2              |
|                       |                        |                                              | Sinusitis            | 2              |
|                       |                        |                                              | Skin wound           | 2              |
|                       |                        |                                              | Surgical drainage    | 22             |
|                       | <i>Robinsoniella</i>   | <i>Robinsoniella peoriensis</i>              | Joint bone infection | 2              |
|                       |                        |                                              | Skin wound           | 1              |
|                       | <i>Sporosarcina</i>    | <i>Sporosarcina ginsengisoli</i>             | Bloodstream          | 1              |
|                       | <i>Streptococcus</i>   | <i>Streptococcus massiliensis</i>            | Bloodstream          | 2              |
|                       |                        |                                              | Peritoneal fluid     | 1              |
|                       |                        |                                              | Skin wound           | 1              |
|                       | <i>Turicibacter</i>    | <i>Turicibacter sanguinis</i>                | Bloodstream          | 2              |
|                       |                        |                                              | Peritoneal fluid     | 1              |
|                       | <i>Veillonella</i>     | <i>Veillonella montpellierensis</i>          | Surgical drainage    | 1              |
| <b>Fusobacteria</b>   | <i>Leptotrichia</i>    | <i>Leptotrichia goodfellowii</i>             | Surgical drainage    | 1              |
|                       |                        | <i>Leptotrichia trevisanii</i>               | Bloodstream          | 3              |
| <b>Proteobacteria</b> | <i>Acinetobacter</i>   | <i>Acinetobacter parvus</i>                  | Bloodstream          | 1              |
|                       |                        |                                              | Sputum               | 1              |
|                       | <i>Comamonas</i>       | <i>Comamonas kerstersii</i>                  | Bloodstream          | 2              |
|                       | <i>Enterobacter</i>    | <i>Enterobacter cowanii</i>                  | Biopsy               | 1              |
|                       |                        |                                              | Sinusitis            | 1              |

| Phylum | Genus               | Bacteria species                | Clinical samples            | N° of Isolates |
|--------|---------------------|---------------------------------|-----------------------------|----------------|
|        |                     |                                 | Urinary tract infection     | 1              |
|        |                     | <i>Enterobacter kobei</i>       | Abscess                     | 3              |
|        |                     |                                 | Biliary drainage            | 3              |
|        |                     |                                 | Biopsy                      | 8              |
|        |                     |                                 | Bloodstream                 | 54             |
|        |                     |                                 | Bone marrow culture         | 1              |
|        |                     |                                 | Bronchoalveolar lavage      | 11             |
|        |                     |                                 | Oral ulcer                  | 1              |
|        |                     |                                 | Conjunctiva                 | 1              |
|        |                     |                                 | Dialysis catheter           | 1              |
|        |                     |                                 | Ear newborn                 | 1              |
|        |                     |                                 | Human semen                 | 1              |
|        |                     |                                 | Intrauterine device         | 1              |
|        |                     |                                 | Joint bone infection        | 7              |
|        |                     |                                 | Nasal swabs                 | 1              |
|        |                     |                                 | Peritoneal fluid            | 2              |
|        |                     |                                 | Pharynx newborn             | 1              |
|        |                     |                                 | Pleural biopsy              | 1              |
|        |                     |                                 | Pulmonary biopsy            | 1              |
|        |                     |                                 | Skin wound                  | 40             |
|        |                     |                                 | Sputum                      | 15             |
|        |                     |                                 | Surgical drainage           | 10             |
|        |                     |                                 | Tracheobronchial aspiration | 18             |
|        |                     |                                 | Umbilical cord bloodstream  | 1              |
|        |                     |                                 | Urinary tract infection     | 89             |
|        | <i>Ochrobactrum</i> | <i>Ochrobactrum grignonense</i> | Bloodstream                 | 1              |
|        | <i>Pandoraea</i>    | <i>Pandoraea pulmonicola</i>    | Bloodstream                 | 2              |
|        |                     |                                 | Bronchoalveolar lavage      | 5              |
|        |                     |                                 | Pleural biopsy              | 1              |
|        |                     |                                 | Sputum                      | 17             |
|        |                     |                                 | Tracheobronchial aspiration | 6              |
|        | <i>Paracoccus</i>   | <i>Paracoccus yeeii</i>         | Bloodstream                 | 2              |
|        | <i>Pseudomonas</i>  | <i>Pseudomonas hibiscicola</i>  | Biopsy                      | 1              |
|        |                     |                                 | Sputum                      | 1              |
|        | <i>Roseomonas</i>   | <i>Roseomonas ludipueritiae</i> | Bloodstream                 | 1              |
|        | <i>Serratia</i>     | <i>Serratia ureilytica</i>      | Skin wound                  | 1              |
